# Supplementary material for: Self-assembly and magnetic properties of Ni(ii)/Co(ii) coordination polymers based on 1,4-bis(imidazol-1-yl)benzene and varying biphenyltetracarboxylates
Source: Royal Society of Chemistry journal article supplement (doi:10.1039/c4ce01020e), 2014-01-01
Supplement: c4ce01020e1.pdf [file c4ce01020e1.pdf]

ARTICLE

ELECTRONIC SUPPLEMENTARY INFORMATION

Self-assembly and Magnetic Properties of Ni(II)/Co(II)  
Coordination Polymers Based on 1,4-Bis(imidazol-1-yl)benzene  
and Varying Biphenyltetracarboxylates

Feng Su<sup>a</sup>, Liping Lu<sup>\*a</sup>, Sisi Feng<sup>a</sup>, and Miaoli Zhu<sup>\*a,b</sup>

<sup>a</sup>Institute of Molecular Science, Key Laboratory of Chemical Biology and Molecular Engineering of the Education Ministry, Shanxi University, Taiyuan, Shanxi 030006, People's Republic of China.

<sup>b</sup>State Key Laboratory of Coordination Chemistry, Nanjing University, Nanjing 210093, P. R. China.

Institute of Molecular Science, Shanxi University, 92 Wucheng Road, Taiyuan, Shanxi 030006, People's Republic of China. Tel: ++86-351-7017974; Fax: ++86-351-7011022; E-mail: [miaoli@sxu.edu.cn](mailto:miaoli@sxu.edu.cn)

Table S1 Bond Lengths [Å] and Angles [°] for 1-5

| Compound 1                    |          |                                |          |
|-------------------------------|----------|--------------------------------|----------|
| Ni(1)-N(5)                    | 2.056(6) | Ni(1)-O(5)                     | 2.063(5) |
| Ni(1)-N(1)                    | 2.073(6) | Ni(1)-N(4) <sup>#1</sup>       | 2.084(6) |
| Ni(1)-O(1)                    | 2.118(5) | Ni(1)-O(2)                     | 2.179(5) |
| N(5)-Ni(1)-O(5)               | 96.5(2)  | N(5)-Ni(1)-N(1)                | 90.5(2)  |
| O(5)-Ni(1)-N(1)               | 91.9(2)  | N(5)-Ni(1)-N(4) <sup>#1</sup>  | 90.2(2)  |
| O(5)-Ni(1)-N(4) <sup>#1</sup> | 88.8(2)  | N(1)-Ni(1)-N(4) <sup>#1</sup>  | 178.9(3) |
| N(5)-Ni(1)-O(1)               | 107.4(2) | O(5)-Ni(1)-O(1)                | 155.7(2) |
| N(1)-Ni(1)-O(1)               | 92.4(2)  | N(4) <sup>#1</sup> -Ni(1)-O(1) | 86.6(2)  |
| N(5)-Ni(1)-O(2)               | 168.8(2) | O(5)-Ni(1)-O(2)                | 94.6(2)  |
| N(1)-Ni(1)-O(2)               | 90.5(2)  | N(4) <sup>#1</sup> -Ni(1)-O(2) | 88.6(2)  |
| O(1)-Ni(1)-O(2)               | 61.4(2)  |                                |          |

Symmetry codes: #1 x - 1/2, y + 1/2, z

  

| Compound 2      |           |                 |            |
|-----------------|-----------|-----------------|------------|
| Ni(1)-O(1)      | 2.073(4)  | Ni(1)-N(1)      | 2.074(4)   |
| Ni(1)-O(3)      | 2.075(4)  | Ni(1)-N(5)      | 2.086(4)   |
| Ni(1)-N(4)      | 2.095(4)  | Ni(1)-O(5)      | 2.102(4)   |
| O(1)-Ni(1)-N(1) | 90.82(16) | O(1)-Ni(1)-O(3) | 179.84(14) |
| N(1)-Ni(1)-O(3) | 89.33(15) | O(1)-Ni(1)-N(5) | 85.57(17)  |
| N(1)-Ni(1)-N(5) | 90.35(16) | O(3)-Ni(1)-N(5) | 94.47(16)  |
| O(1)-Ni(1)-N(4) | 89.28(16) | N(1)-Ni(1)-N(4) | 177.61(16) |
| O(3)-Ni(1)-N(4) | 90.56(16) | N(5)-Ni(1)-N(4) | 92.03(16)  |
| O(1)-Ni(1)-O(5) | 91.84(17) | N(1)-Ni(1)-O(5) | 93.14(16)  |
| O(3)-Ni(1)-O(5) | 88.12(15) | N(5)-Ni(1)-O(5) | 175.68(15) |
| N(4)-Ni(1)-O(5) | 84.47(15) |                 |            |

| Compound 3                     |            |                                |            |
|--------------------------------|------------|--------------------------------|------------|
| Co(1)-O(2) <sup>#1</sup>       | 2.042(2)   | Co(1)-O(1)                     | 2.046(2)   |
| Co(1)-N(1)                     | 2.110(3)   | Co(1)-N(4)                     | 2.145(3)   |
| Co(1)-O(5)                     | 2.163(3)   | Co(1)-O(6)                     | 2.180(3)   |
| O(2) <sup>#1</sup> -Co(1)-O(1) | 102.20(10) | O(2) <sup>#1</sup> -Co(1)-N(1) | 88.45(10)  |
| O(1)-Co(1)-N(1)                | 85.90(10)  | O(2) <sup>#1</sup> -Co(1)-N(4) | 93.64(10)  |
| O(1)-Co(1)-N(4)                | 93.13(10)  | N(1)-Co(1)-N(4)                | 177.84(11) |
| O(2) <sup>#1</sup> -Co(1)-O(5) | 169.27(10) | O(1)-Co(1)-O(5)                | 88.47(10)  |
| N(1)-Co(1)-O(5)                | 91.24(11)  | N(4)-Co(1)-O(5)                | 86.81(11)  |
| O(2) <sup>#1</sup> -Co(1)-O(6) | 84.75(10)  | O(1)-Co(1)-O(6)                | 170.70(11) |
| N(1)-Co(1)-O(6)                | 88.15(12)  | N(4)-Co(1)-O(6)                | 92.58(12)  |
| O(5)-Co(1)-O(6)                | 84.72(11)  |                                |            |

Symmetry codes: #1 -x + 1, -y + 2, -z + 2

| Compound 4        |            |                     |            |
|-------------------|------------|---------------------|------------|
| Ni(1)-O(3)        | 2.040(4)   | Ni(1)-O(1)          | 2.066(4)   |
| Ni(1)-O(5)        | 2.066(4)   | Ni(1)-N(1)          | 2.087(4)   |
| Ni(1)-N(3)        | 2.090(4)   | Ni(1)-O(1)#1        | 2.141(4)   |
| Ni(1)-Ni(1)A      | 3.229(1)   |                     |            |
| O(3)-Ni(1)-O(1)   | 92.54(15)  | O(3)-Ni(1)-O(5)     | 92.47(16)  |
| O(1)-Ni(1)-O(5)   | 174.59(15) | O(3)-Ni(1)-N(1)     | 83.72(17)  |
| O(1)-Ni(1)-N(1)   | 89.16(16)  | O(5)-Ni(1)-N(1)     | 89.37(16)  |
| O(3)-Ni(1)-N(3)   | 96.62(18)  | O(1)-Ni(1)-N(3)     | 95.38(17)  |
| O(5)-Ni(1)-N(3)   | 86.06(17)  | N(1)-Ni(1)-N(3)     | 175.42(18) |
| O(3)-Ni(1)-O(1)#1 | 167.71(16) | O(1)-Ni(1)-O(1)#1   | 79.70(15)  |
| O(5)-Ni(1)-O(1)#1 | 95.02(15)  | N(1)-Ni(1)-O(1)#1   | 86.62(16)  |
| N(3)-Ni(1)-O(1)#1 | 93.61(16)  | Ni(1)-O(1)- Ni(1)#1 | 100.3(2)   |

Symmetry codes: #1 -x + 1, -y + 1, -z + 1; #2(A) 1 - x, 1 - y, 1 - z

| Compound 5                    |           |                               |           |
|-------------------------------|-----------|-------------------------------|-----------|
| Co(1)-O(3)                    | 2.061(1)  | Co(1)-O(5)                    | 2.098(2)  |
| Co(1)-O(1)                    | 2.105(1)  | Co(1)-N(4)                    | 2.133(2)  |
| Co(1)-N(1)                    | 2.146(2)  | Co(1)-O(1) <sup>#1</sup>      | 2.1146(2) |
| Co(1)-Co(1A) <sup>#2</sup>    | 3.268(1)  |                               |           |
| O(3)-Co(1)-O(5)               | 96.02(9)  | O(3)-Co(1)-O(1)               | 89.52(7)  |
| O(5)-Co(1)-O(1)               | 174.01(8) | O(3)-Co(1)-N(4)               | 97.87(8)  |
| O(5)-Co(1)-N(4)               | 86.16(9)  | O(1)-Co(1)-N(4)               | 95.36(8)  |
| O(3)-Co(1)-N(1)               | 82.68(8)  | O(5)-Co(1)-N(1)               | 88.80(8)  |
| O(1)-Co(1)-N(1)               | 89.65(8)  | N(4)-Co(1)-N(1)               | 174.95(8) |
| O(3)-Co(1)-O(1) <sup>#1</sup> | 164.92(7) | O(5)-Co(1)-O(1) <sup>#1</sup> | 93.82(8)  |
| O(1)-Co(1)-O(1) <sup>#1</sup> | 80.31(7)  | N(4)-Co(1)-O(1) <sup>#1</sup> | 94.17(8)  |
| N(1)-Co(1)-O(1) <sup>#1</sup> | 86.13(8)  | Co(1)-O(1)- Co(1)             | 99.7(1)   |

Symmetry codes: #1 -x + 1, -y + 1, -z + 1; #2(A) 1 - x, 1 - y, 1 - z

Table S2 Hydrogen Bonds for 1-5 [Å and deg.]

| Compound 1          |      |      |          |
|---------------------|------|------|----------|
| O(5)-H(5A)...O(2)#5 | 0.82 | 2.01 | 2.752(7) |
|                     |      |      | 149.7    |

Symmetry code: #5 -x + 1/2, -y + 3/2, -z

| Compound 2                      |      |      |           |
|---------------------------------|------|------|-----------|
| O(7)-H(7D)...O(6) <sup>#7</sup> | 0.88 | 2.12 | 2.872(9)  |
| O(7)-H(7C)...O(2) <sup>#8</sup> | 0.84 | 2.03 | 2.778(10) |
| O(6)-H(6D)...O(7)               | 0.82 | 2.45 | 3.203(10) |
| O(6)-H(6C)...O(4) <sup>#4</sup> | 0.82 | 2.03 | 2.786(7)  |
| O(8)-H(8C)...O(2) <sup>#6</sup> | 0.83 | 2.15 | 2.959(17) |
| O(5)-H(5D)...O(3) <sup>#6</sup> | 0.82 | 2.07 | 2.764(5)  |
| O(5)-H(5C)...O(2)               | 0.83 | 1.91 | 2.704(7)  |
|                                 |      |      | 160.2     |

Symmetry codes: #4 -x + 1/2, y + 1/2, -z + 1/2; #6 -x + 1/2, -y + 1/2, -z + 1; #7 -x + 1, y, -z + 1/2; #8 x, -y + 1, z - 1/2

| Compound 3                      |         |         |          |        |
|---------------------------------|---------|---------|----------|--------|
| O(5)-H(5A)...O(3) <sup>#5</sup> | 0.94(5) | 1.85(5) | 2.786(4) | 177(4) |
| O(5)-H(5B)...O(4) <sup>#6</sup> | 0.79(4) | 1.91(4) | 2.695(3) | 170(4) |
| O(6)-H(6A)...O(3) <sup>#6</sup> | 0.77(4) | 2.05(4) | 2.820(4) | 174(5) |
| O(6)-H(6B)...O(4) <sup>#5</sup> | 0.89(4) | 1.88(4) | 2.765(4) | 175(4) |

Symmetry codes: #5  $x, -y + 3/2, z + 1/2$ ; #6  $-x, y + 1/2, -z + 3/2$

| Compound 4                      |      |      |          |       |
|---------------------------------|------|------|----------|-------|
| O(5)-H(5A)...O(3) <sup>#5</sup> | 0.82 | 1.97 | 2.792(5) | 174.8 |
| O(5)-H(5B)...O(2) <sup>#1</sup> | 0.82 | 2.07 | 2.797(6) | 148   |

Symmetry codes: #1  $-x + 1, -y + 1, -z + 1$ ; #5  $-x + 1, -y + 1, -z + 1$

| Compound 5                       |         |          |          |        |
|----------------------------------|---------|----------|----------|--------|
| D-H...A                          | d(D-H)  | d(H...A) | d(D...A) | <(DHA) |
| C(11)-H(11)...O(4) <sup>#5</sup> | 0.93    | 2.34     | 3.248(3) | 165.4  |
| C(2)-H(2)O(2) <sup>#6</sup>      | 0.93    | 2.47     | 3.256(3) | 142.9  |
| C(3)-H(3)...O(4) <sup>#7</sup>   | 0.93    | 2.43     | 3.269(3) | 149.4  |
| C(18)-H(18)...O(4) <sup>#8</sup> | 0.93    | 2.52     | 3.376(3) | 152.5  |
| O(5)-H(5A)...O(2) <sup>#1</sup>  | 0.78(3) | 2.13(3)  | 2.827(3) | 148(3) |
| O(5)-H(5B)...O(3) <sup>#7</sup>  | 0.86(4) | 1.93(4)  | 2.790(3) | 178(3) |

Symmetry code: #1  $-x - 1, -y, -z + 1$ ; #5  $x, y - 1, z$ ; #7  $-x, -y, -z + 1$ ; #8  $-x, -y, -z$

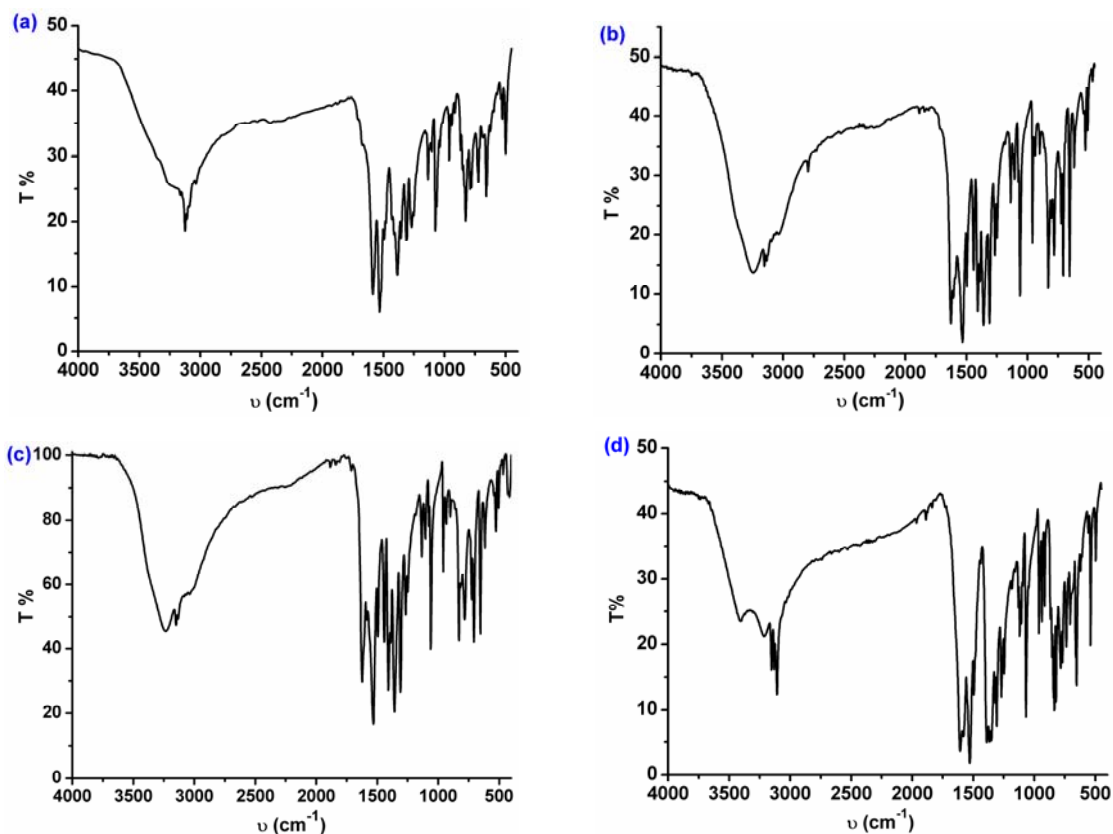

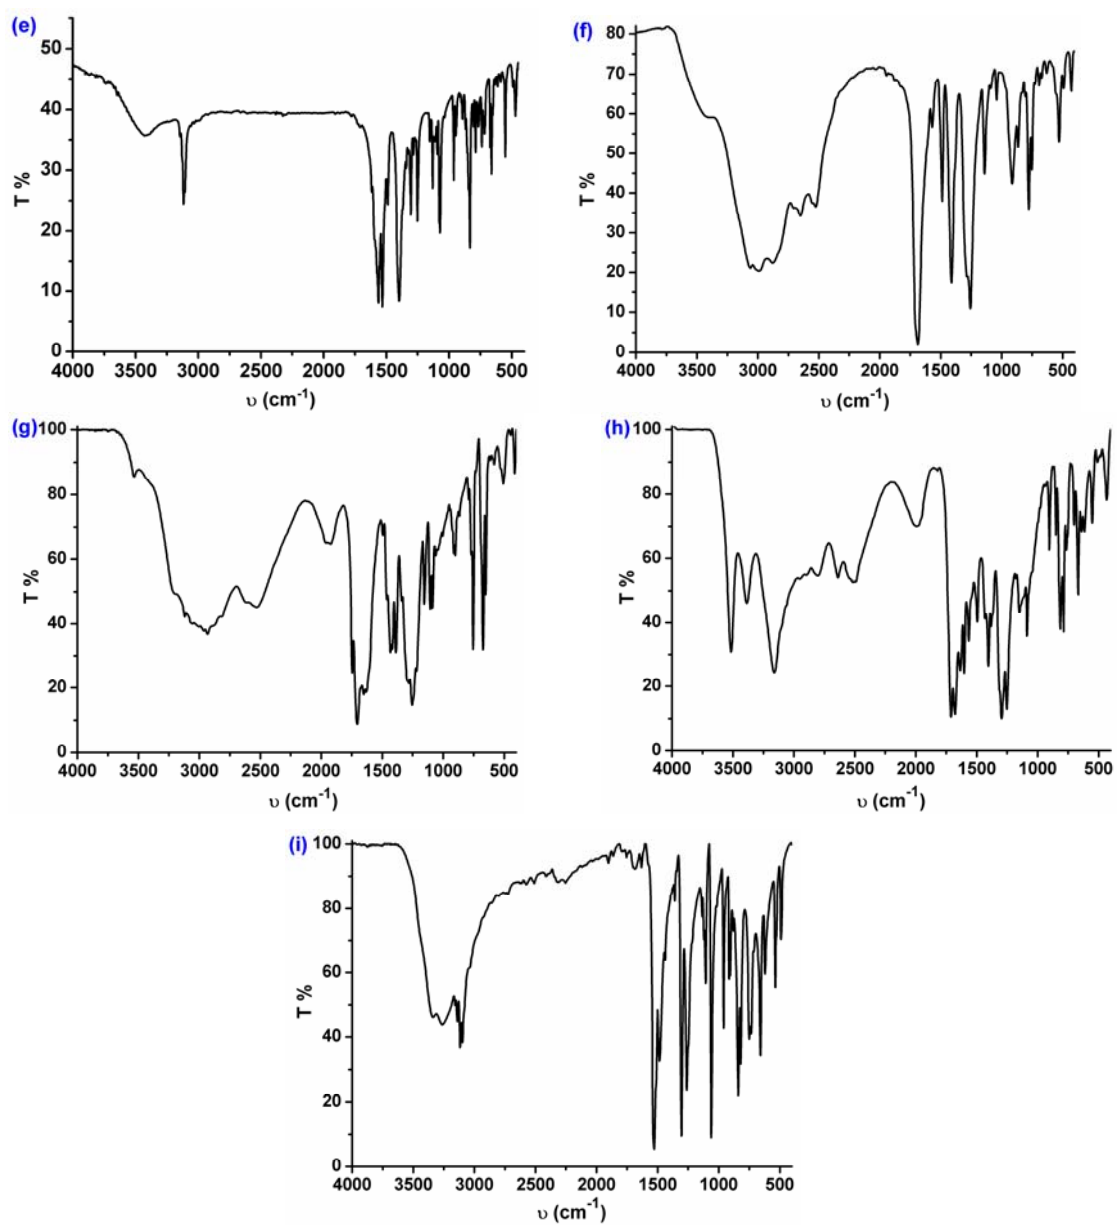

Figure S1 The FTIR spectra of of 1 (a), 2 (b), 3 (c), 4 (d), 5 (e), H4(o,m-bpta) (f), H4(m,m-bpta) (g), H4(m,p-bpta) (h), and 1,4-bib.

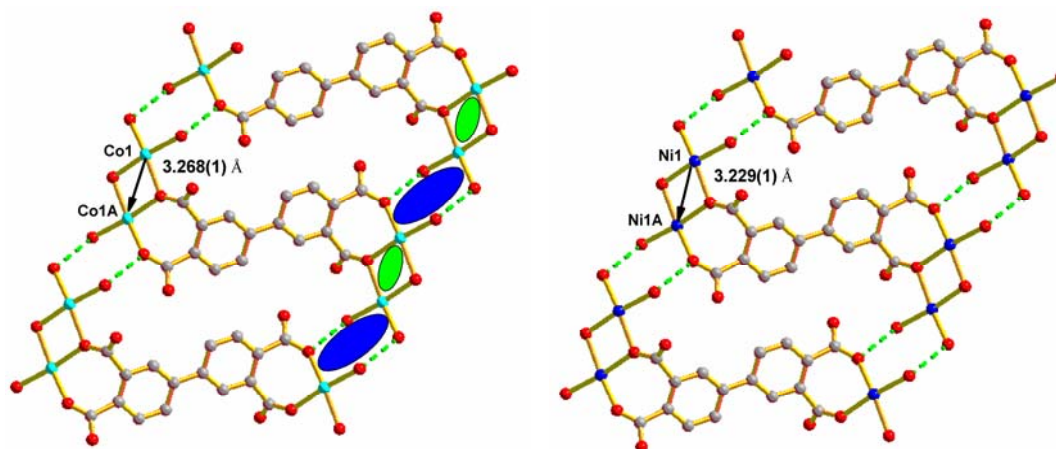

Figure S2 Compare the distance of Co1–Co1A with the distance of Ni1–Ni1A in compound 4, and 5

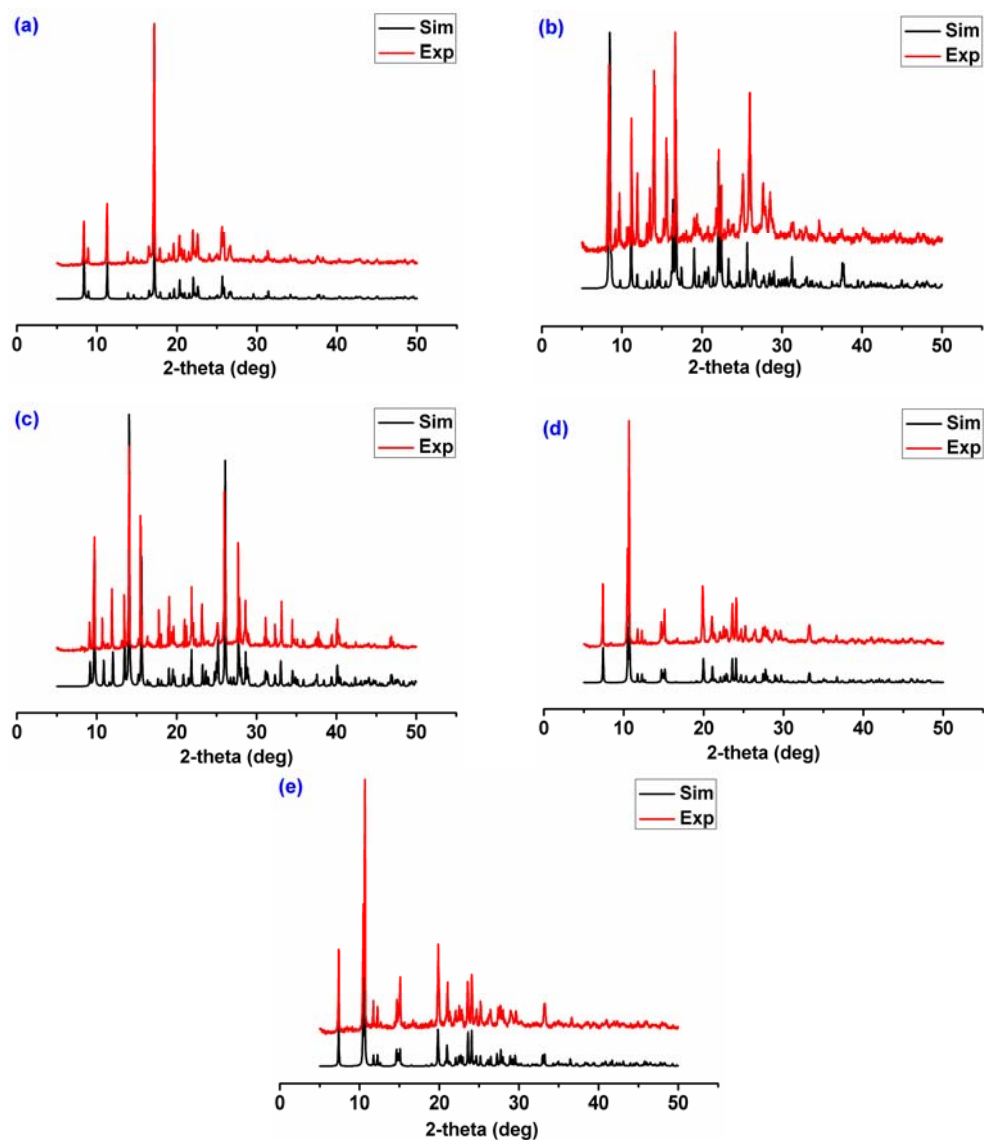

Figure S3 Comparison of the simulated and experimental XRPD patterns of 1 (a), 2 (b), 3 (c), 4 (d), and 5 (e)

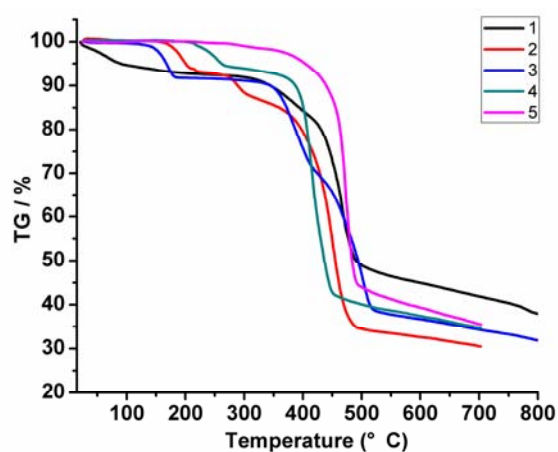

Figure S4 TGA curves of 1-5

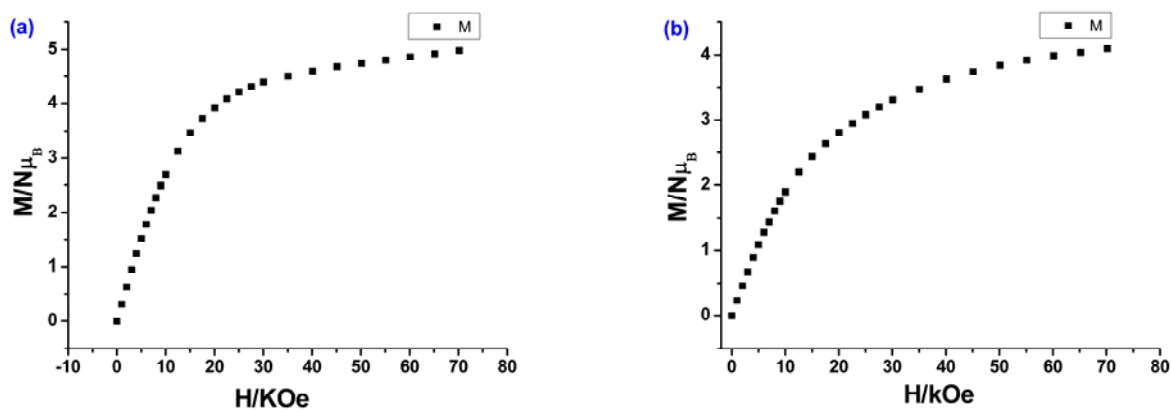

Figure S5 Plots of field dependence of the magnetization (M) of compounds 4 (a), and 5 (b) at 1.8 K.
